# Supplementary material for: Efficient UV-vis-IR photothermocatalytic selective ethanol oxidation on MnOx/TiO2 nanocomposites significantly enhanced by a novel photoactivation
Source: Royal Society of Chemistry journal article supplement (doi:10.1039/c9ta12531k), 2019-12-10
Supplement: c9ta12531k1.pdf [file c9ta12531k1.pdf]

---

**Supporting Information**

**Efficient UV-vis-IR photothermocatalytic selective ethanol oxidation on  $\text{MnO}_x/\text{TiO}_2$  nanocomposite significantly enhanced by a novel photoactivation**

*Yi Yang,<sup>ab</sup> Shaowen Wu,<sup>a</sup> Yuanzhi Li,<sup>\*a</sup> Qian Zhang<sup>a</sup> and Xiujian Zhao<sup>a</sup>*

<sup>a</sup>State Key Laboratory of Silicate Materials for Architectures, Wuhan University of Technology, 122

Luoshi Road, Wuhan 430070, P. R. China. Email: liyuanzhi66@hotmail.com

<sup>b</sup>College of Science, Huazhong Agricultural University, Wuhan 430070, P. R. China.

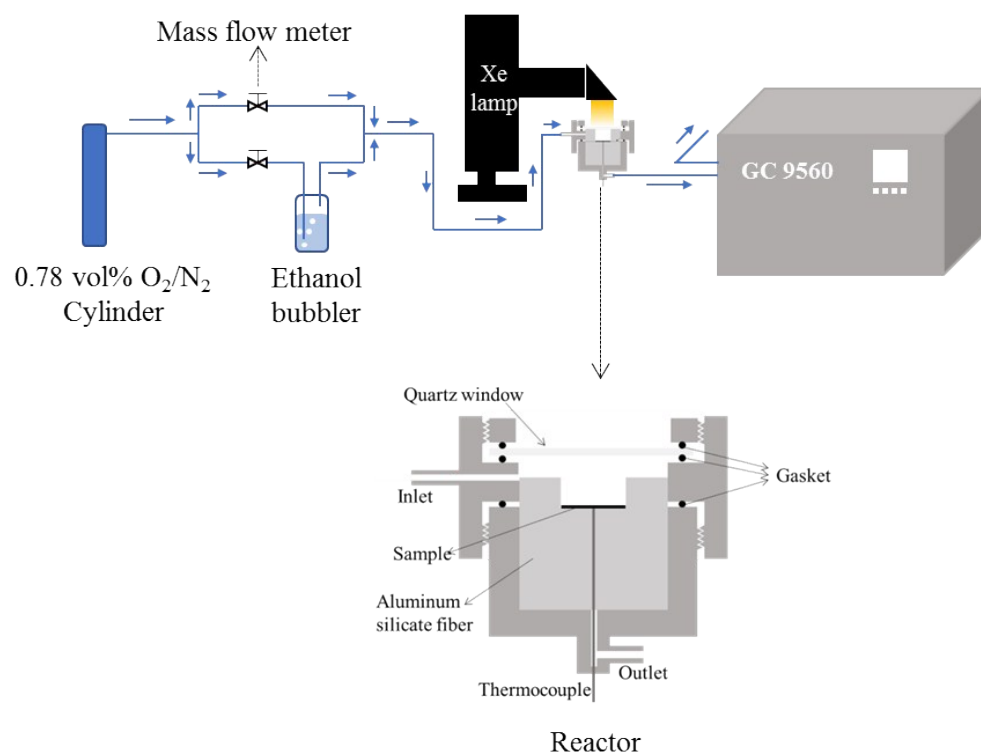

**Scheme S1.** Schematic illustration of a setup for testing photothermocatalytic activity of the samples for selective ethanol oxidation under the irradiation from a Xe lamp.

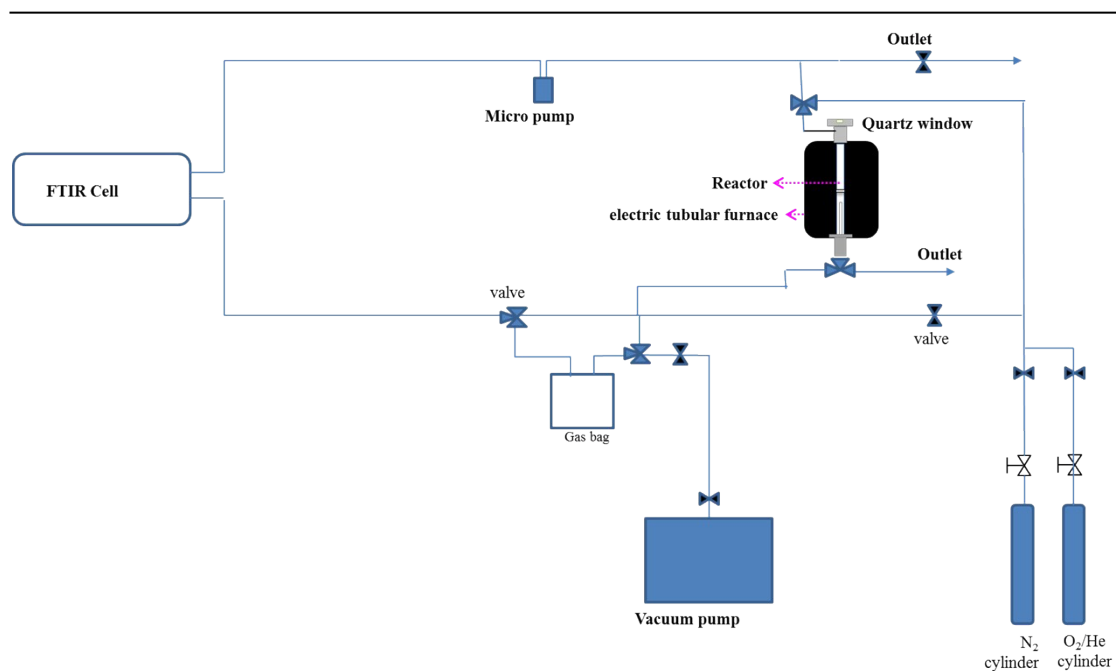

**Scheme S2.** Schematic illustration of a setup for conducting temperature programmed ethanol oxidation in the absence O<sub>2</sub> in the dark and under UV-vis-IR irradiation.

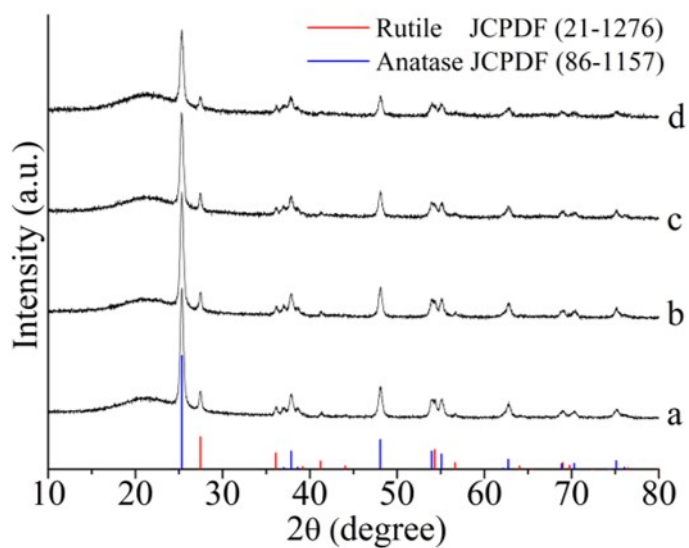

**Figure S1.** XRD patterns of the samples: MnO<sub>x</sub>/TiO<sub>2</sub>-A (a), MnO<sub>x</sub>/TiO<sub>2</sub>-B (b), MnO<sub>x</sub>/TiO<sub>2</sub>-C (c) and MnO<sub>x</sub>/TiO<sub>2</sub>-D (d).

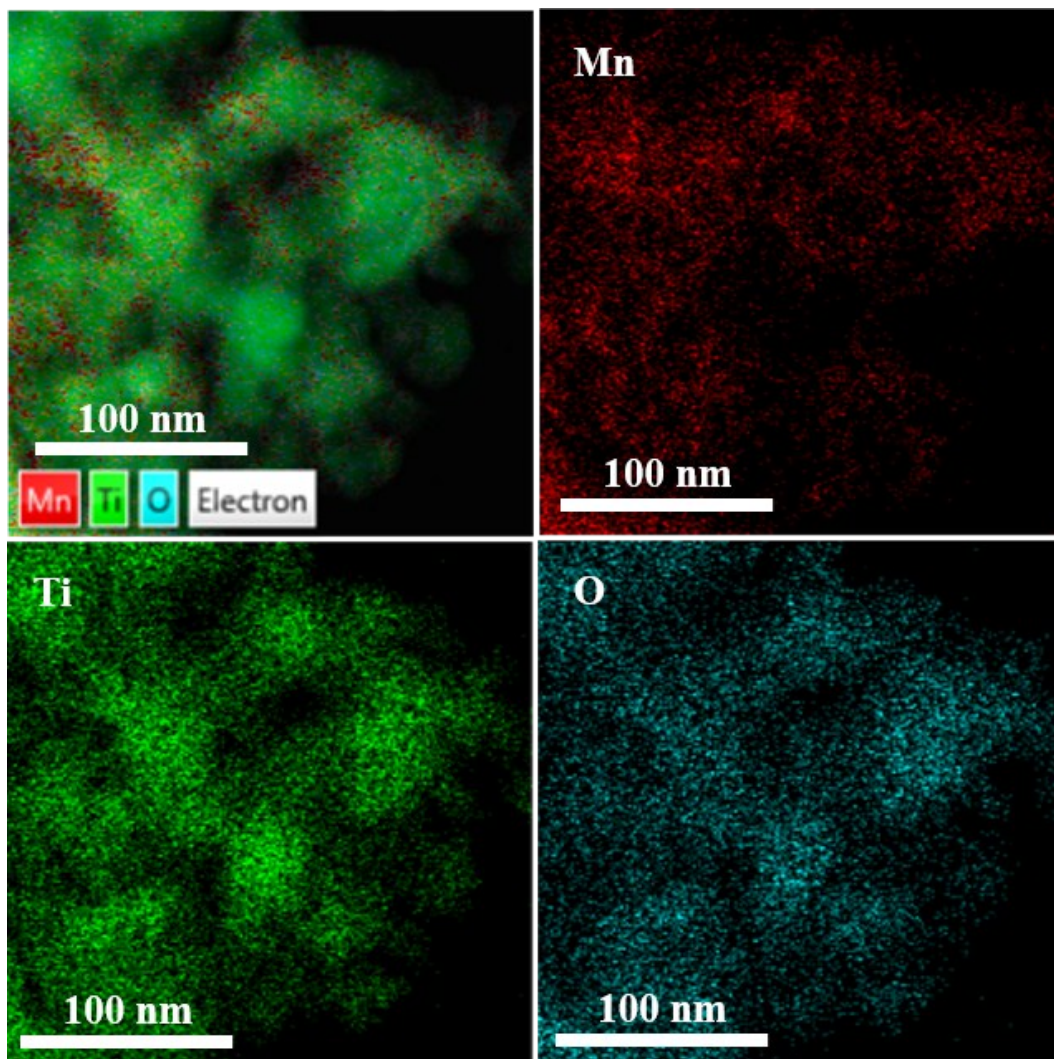

**Figure S2.** TEM EDX mapping of the elements in MnO<sub>x</sub>/TiO<sub>2</sub>-C

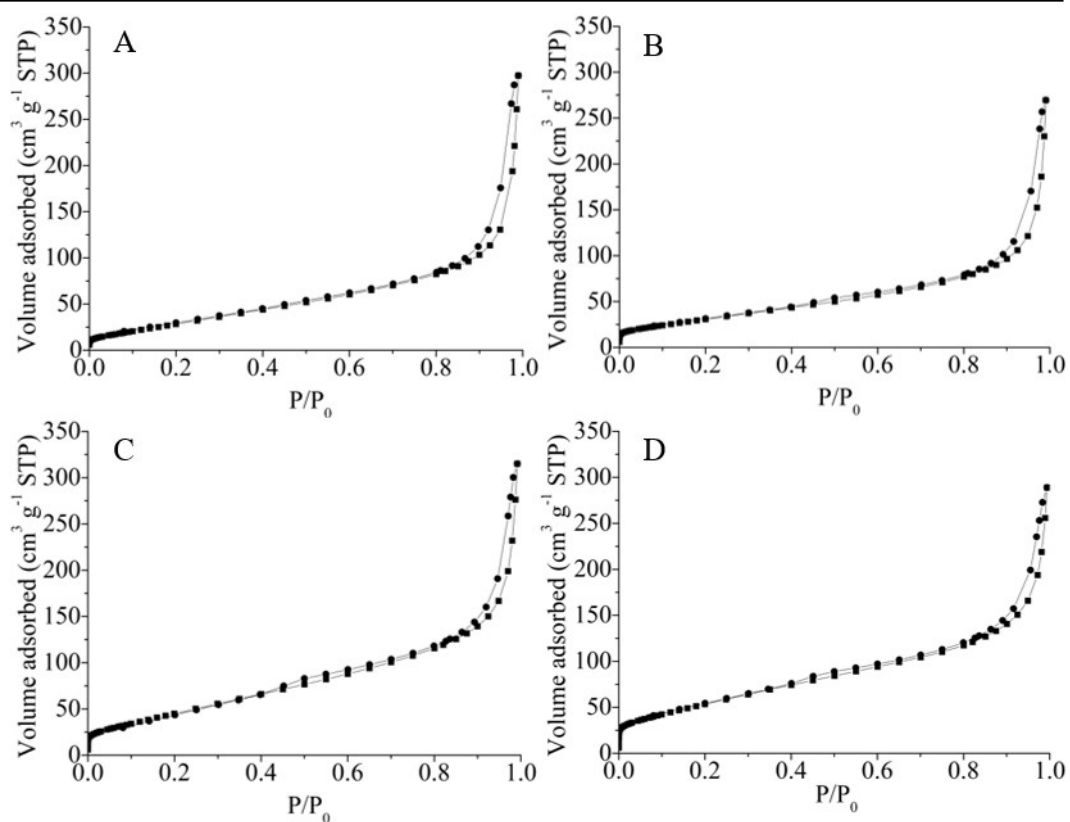

**Figure S3.** N<sub>2</sub> adsorption-desorption of the samples: MnO<sub>x</sub>/TiO<sub>2</sub>-A (A), MnO<sub>x</sub>/TiO<sub>2</sub>-B (B), MnO<sub>x</sub>/TiO<sub>2</sub>-C (C), and MnO<sub>x</sub>/TiO<sub>2</sub>-D (D).

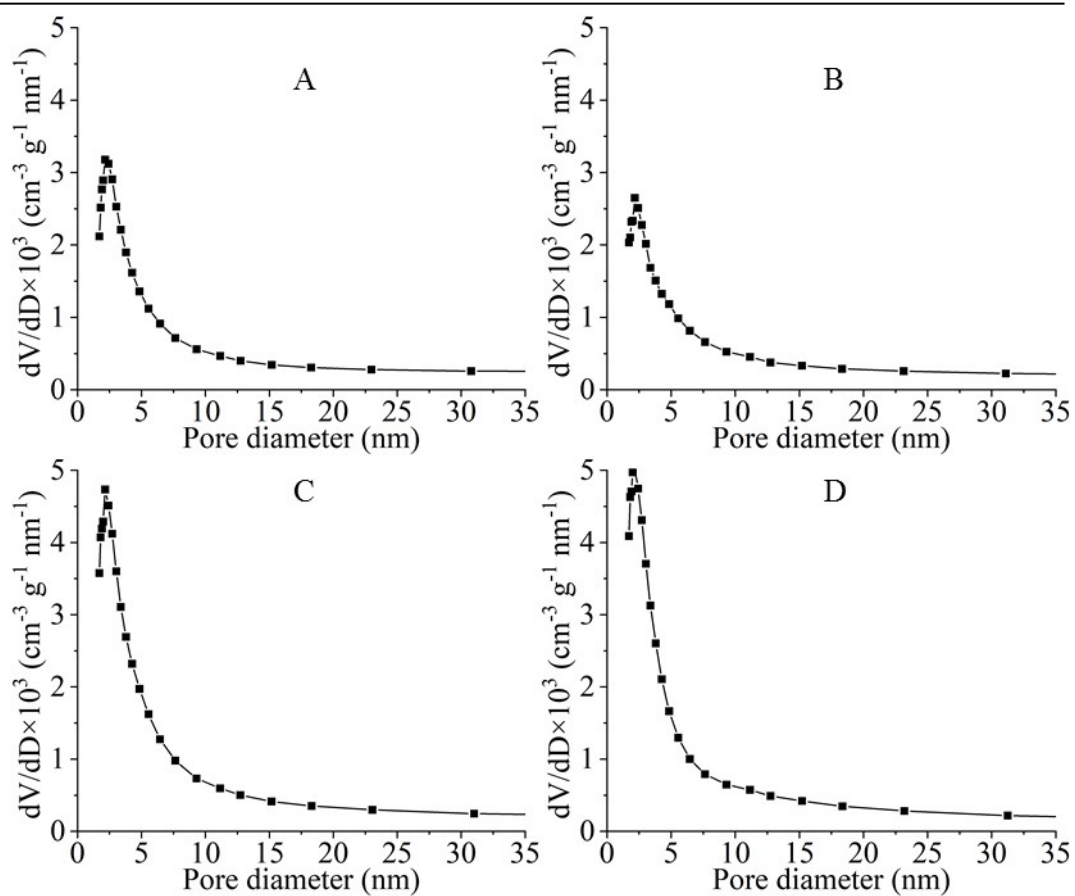

**Figure S4.** BJH adsorption pore size distribution of the samples:  $\text{MnO}_x/\text{TiO}_2$ -A (A),  $\text{MnO}_x/\text{TiO}_2$ -B (B),  $\text{MnO}_x/\text{TiO}_2$ -C (C), and  $\text{MnO}_x/\text{TiO}_2$ -D (D).
